# Supplementary material for: Antiproliferative and Cytotoxic Activities of Fluorescein—A Diagnostic Angiography Dye
Source: MDPI journal article supplement (doi:10.3390/ijms23031504), 2022-01-28
Supplement: s1 [file s1]

# Antiproliferative and Cytotoxic Activities of Fluorescein – A Diagnostic Angiography Dye

Mária Šranková <sup>1</sup>, Aleš Dvořák <sup>1</sup>, Marek Martínek <sup>2</sup>, Peter Šebej <sup>2</sup>, Petr Klán <sup>2,3</sup>, Libor Vitek <sup>1,4,\*</sup> and Lucie Muchová <sup>1,\*</sup>

<sup>1</sup> Institute of Medical Biochemistry and Laboratory Diagnostics, General University Hospital in Prague and 1st Faculty of Medicine, Charles University, Na Bojišti 3, 121 08 Praha, Czech Republic; majka.srankova@gmail.com (M.Š.); aleshdvorak@gmail.com (A.D.)

<sup>2</sup> RECETOX, Faculty of Science, Masaryk University, Kotlářská 2, 611 37 Brno, Czech Republic; marek.martinek@gmail.com (M.M.); sebj@recetox.muni.cz (P.Š.); klan@sci.muni.cz (P.K.)

<sup>3</sup> Department of Chemistry, Faculty of Science, Masaryk University, Kamenice 5, 625 00 Brno, Czech Republic;

<sup>4</sup> 4th Department of Internal Medicine, General University Hospital in Prague and 1st Faculty of Medicine, Charles University, U Nemocnice 2, 128 08 Praha, Czech Republic

\* Correspondence: lucie.muchova@lf1.cuni.cz (L.M.); vitek@cesnet.cz (L.V.); Tel.: +42-022-496-4199 (L.M.)

## Materials and Methods

### Singlet oxygen production

#### Normoxia

To study the production of <sup>1</sup>O<sub>2</sub>, we used 9,10-anthracenediyl-bis(methylene)dimalonic acid (ABDA) as a spectrophotometric probe. For the evaluation of <sup>1</sup>O<sub>2</sub> quantum yield, the decrease in the absorbance of ABDA at its absorption maximum ( $\lambda_{\text{abs(max)}} = 381 \text{ nm}$ ) upon irradiation of the compound of interest with white light (4 intervals,  $t_{\text{int}} = 7 \text{ min}$ ,  $I = 350 \text{ mW/cm}^2$ ) was analyzed. Rose Bengal (RB) was used as a standard [1,2]. Stock solutions of fluorescein disodium salt ( $c = 7.5 \text{ mmol/l}$ , DMSO), ABDA ( $c = 2 \text{ mmol/l}$ , DMSO) and RB ( $c = 750 \text{ } \mu\text{mol/l}$ , PBS) were stored in a freezer ( $-18 \text{ } ^\circ\text{C}$ ) for a short-term basis. The final concentration of photosensitizers in the tested sample was  $1.4 \text{ } \mu\text{mol/l}$  (PBS, 7% ( $v/v$ ) DMSO) and  $140 \text{ } \mu\text{mol/l}$  (PBS, 7% ( $v/v$ ) DMSO) for ABDA. Experiments were performed in quadruplicates.

The quantum yield of <sup>1</sup>O<sub>2</sub> generated upon sensitization was calculated using Eq. (1) [3]:

$$\varphi_A = \varphi_{RB} \times \frac{S_A I_{RB}^{ABS}}{S_{RB} I_A^{ABS}},$$

where  $\varphi$  is the <sup>1</sup>O<sub>2</sub> quantum yield of the photosensitizer,  $S$  is the rate of consumption (decay) of the <sup>1</sup>O<sub>2</sub> acceptor in the presence of the tested compound, and  $I^{ABS}$  is the amount of light quanta absorbed by the photosensitizer (either standard, RB, or tested compound).  $I^{ABS}$  was calculated as an integral of the product of relative light source intensity, and the ratio of absorbed and incident radiant flux of the tested sample with respect to the wavelength.  $S_A$  and  $S_{RB}$  were calculated with using least square regression.

## Hypoxia

The  $^{18}\text{O}_2$  experiment was also performed in a hypoxic chamber (InvivoO2® 400 Physoxia Workstation, Baker Ruskinn, Sanford, ME, USA). After analogous solution preparation under normal atmosphere, the irradiation and measurements were carried out in the hypoxic chamber with the following parameters: 9% (v/v)  $\text{O}_2$ , 1.5% (v/v)  $\text{CO}_2$ ,  $t = 32\text{ }^\circ\text{C}$  and relative humidity  $\text{RH} = 50\%$ . Only fluorescein solutions were measured in this experimental design, without the use of RB as a standard. Relative values of ABDA's decrease in absorbance were compared with results obtained under normal atmosphere to evaluate the impact of  $\text{O}_2$  level on  $^{18}\text{O}_2$  production.

## Quantification of released CO

### GC-MS analysis

Aerated reaction mixtures of fluorescein ( $c \sim 2 \times 10^{-5}\text{ mol/l}$ ,  $V = 0.5\text{ ml}$ ) in aqueous solution (PBS buffer,  $\text{pH} = 7.4$ ,  $I = 0.1\text{ mol/l}$ ) in a 2 mL head-space vial with a gas-tight septum were irradiated using three 100 W white LED lamps for 4 days (full conversion; judged by the disappearance of the starting material, as determined by disappearance of the typical spectral features in the visible light portion of the respective absorption spectra), and an aliquot (100  $\mu\text{l}$ ) of the gaseous phase over the reaction mixture was analyzed by gas chromatography coupled with a mass spectrometry detector (GC with MS). The values obtained were at least four orders of magnitude higher than background CO (g) levels (in the ambient air), and thus the obtained values were not corrected to the background.

### GC-RGA analysis

A solution of fluorescein in PBS buffer ( $c = 150\text{ }\mu\text{mol/l}$ ,  $V = 100\text{ }\mu\text{l}$ ) was exhaustively irradiated by white light ( $t = 16\text{ h}$ ) in clear CO-free septum-sealed vials. CO released into the vial headspace was measured using gas chromatography with a reduction gas analyzer (GC-RGA Peak Performer 1, Peak Laboratories, CA, USA) as previously described [4].

The measured values were compared with the theoretical yields using the assumption of one CO molecule released from each degraded molecule of fluorescein dye molecule.

## Fluorescence microscopy

To visualize fluorescein cellular localization, human hepatoblastoma HepG2 cells were seeded into a 24-well plate and cultured according to the manufacturer's protocol. At time  $t = 0$ , growth media were replaced for fluorescein ( $c = 150\text{ }\mu\text{mol/l}$ ) or FDA ( $c = 150\text{ }\mu\text{mol/l}$ , MEM with 1% (v/v) DMSO as a co-solvent) and incubated for 30 min at  $37\text{ }^\circ\text{C}$  and 5% (v/v)  $\text{CO}_2$ . Then, the cells were washed 3 $\times$  with PBS, and visualized using fluorescence microscopy (Olympus IX 51 with mercury burner U-RFL-T, Olympus, Japan). Selected areas from each well were photographed under 20 $\times$  magnification and fixed exposure times using a WIB 520 nm emission filter.

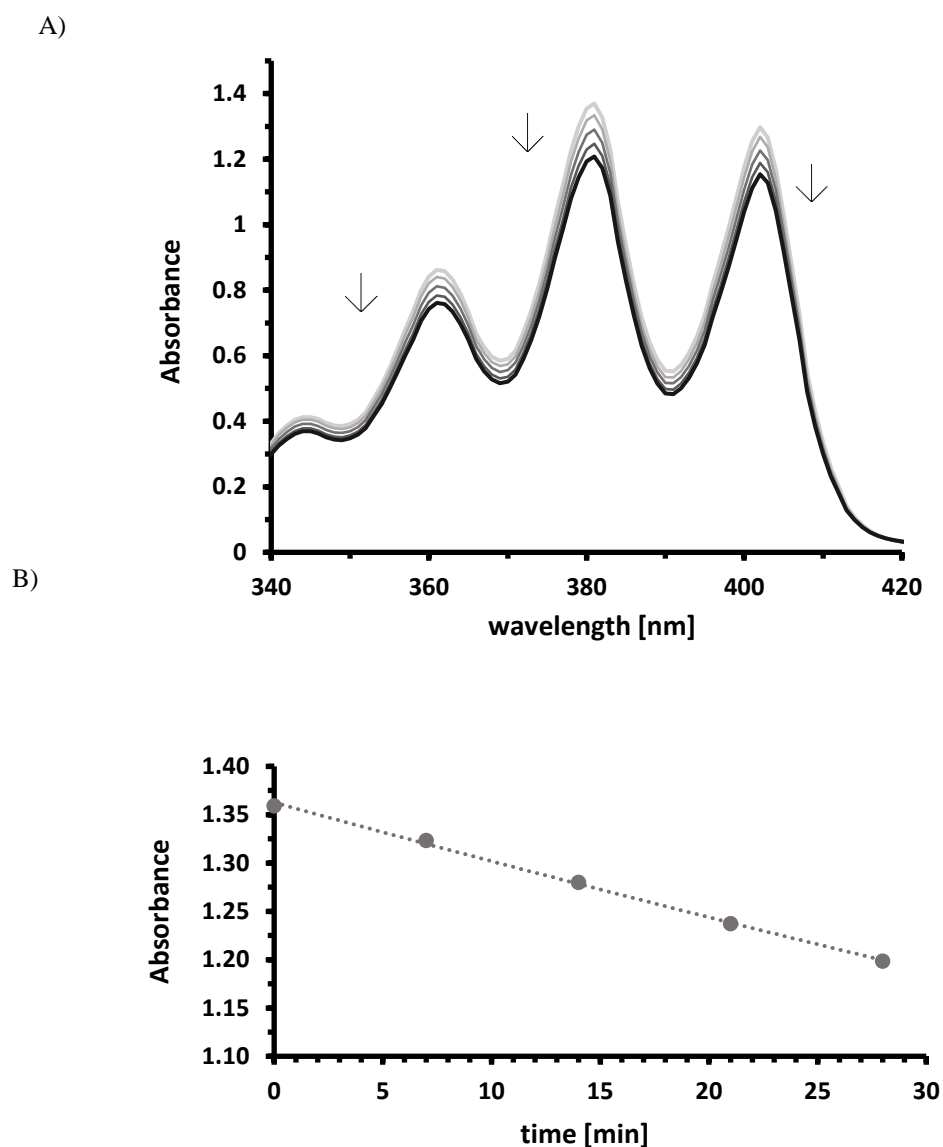

**Figure S1.** Determination of  $^1\text{O}_2$  production upon irradiation of fluorescein (21%  $\text{O}_2$ , PBS,  $c(\text{ABDA}) = 140 \mu\text{mol/l}$ ,  $c(\text{FL}) = 1.4 \mu\text{mol/l}$ ,  $I = 350 \text{ mW/cm}^2$ ). **A)** Change in absorption spectra of ABDA and fluorescein solution over time upon irradiation with white light; **B)** Absorption change at  $\lambda_{\text{abs}} = 381 \text{ nm}$  (corresponding to the absorption maximum of ABDA) over time upon irradiation together with a linear function fit; ABDA - 9,10-anthracenediyl-bis(methylene)dimalononic acid; arrows indicate the direction of change of the absorption spectra. Spectra were recorded every 7 min.

**Table S1.  $^1\text{O}_2$  quantum yield of fluorescein** (21% (v/v)  $\text{O}_2$ , PBS,  $c(\text{FL}) = 1.4 \mu\text{mol/l}$ ,  $I = 350 \text{ mW/cm}^2$ ) determined with the use of an ABDA spectrophotometric probe ( $c(\text{ABDA}) = 140 \mu\text{mol/l}$ ) and a standard, RB ( $\phi(^1\text{O}_2) = 0.75[1]$ ) compared with values from the literature.

| Fluorescein                                       | Our result  | Literature      |
|---------------------------------------------------|-------------|-----------------|
| $^1\text{O}_2$ quantum yield $\phi(^1\text{O}_2)$ | 0.015-0.028 | 0.03[1] 0.06[5] |

**Table S2.** Yield of CO released upon irradiation of fluorescein ( $c = 150 \mu\text{mol/l}$ ) in PBS (100  $\mu\text{l}$ ) measured by means of gas chromatography coupled with a reduction gas analyzer (GC-RGA) or mass spectrometry (GC-MS).

| Type of analysis | GC/RGA      | GC/MS       |
|------------------|-------------|-------------|
| CO yield (%)     | $41 \pm 11$ | $39 \pm 13$ |

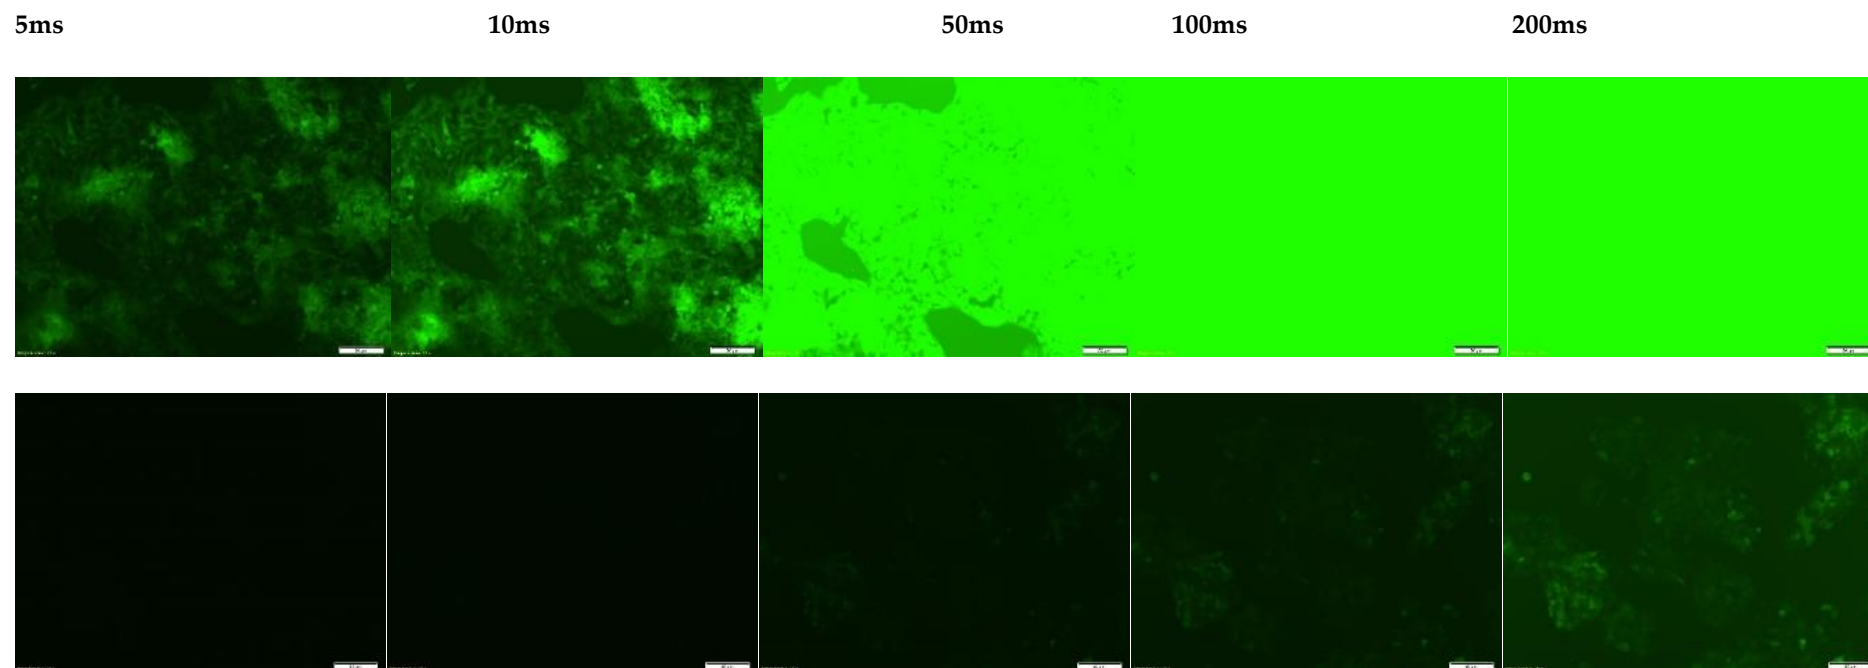

**Figure S2.** Fluorescent microscopy images of HepG2 cells treated with FDA ( $c = 150 \mu\text{mol/l}$ , top) or fluorescein ( $c = 150 \mu\text{mol/l}$ , bottom) for 30 minutes. Fixed exposure times were set for 5, 10, 50, 100 or 200 ms to compare the fluorescence of the cells. The scale bar represents  $50 \mu\text{m}$ .

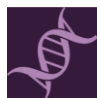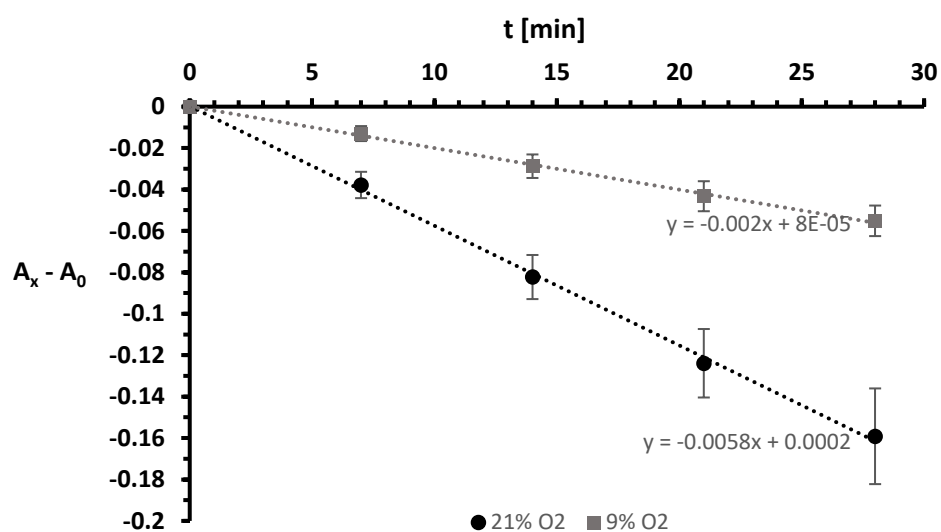

**Figure S3.** Absorption change of ABDA and fluorescein solution upon irradiation under normoxic and hypoxic conditions. Absorption change at  $\lambda_{\text{abs}} = 381$  nm (ABDA absorption maximum) of ABDA and fluorescein solution upon irradiation under normoxic (black circle) and hypoxic (grey square) conditions (PBS,  $c(\text{ABDA}) = 140 \mu\text{mol/l}$ ,  $c(\text{FL}) = 1.4 \mu\text{mol/l}$ ,  $I = 350 \text{ mW cm}^{-2}$  white light). Spectra were recorded every 7 min;  $n = 8$ ;  $A_x$ , absorbance at  $t = x$ ;  $A_0$ , absorbance at  $t = 0$ .

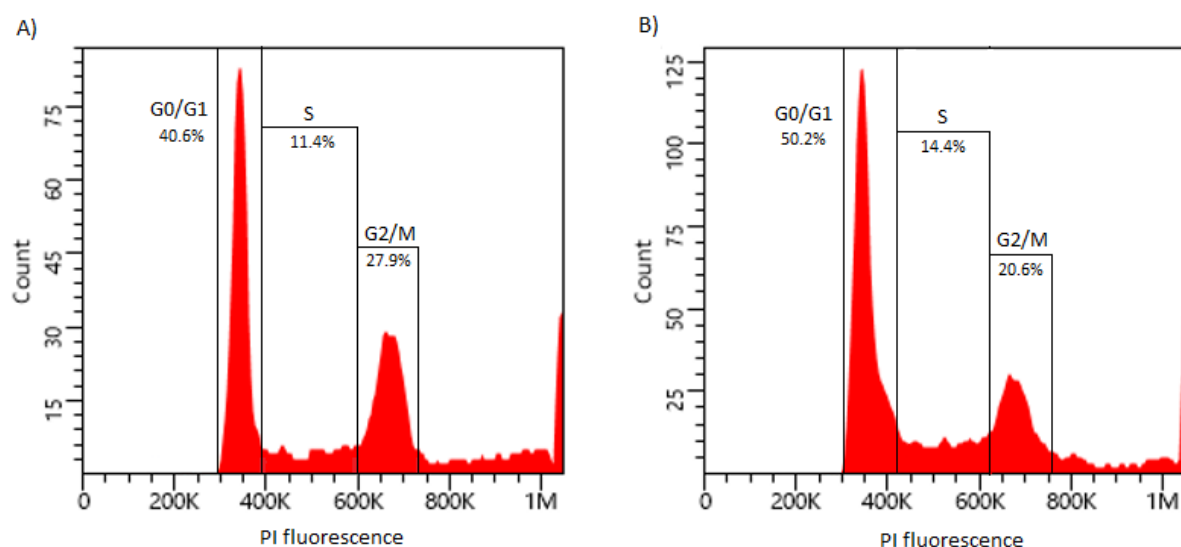

**Figure S4.** Histograms of the cell cycle distribution of control cells (A) and cells treated with FDA and simultaneously irradiated for 2 h ( $I = 160 \text{ mW/cm}^2$ ,  $C_{\text{FDA}} = 150 \text{ }\mu\text{mol/l}$ ). Graphs represent the distribution of cells (“Count”) according to the fluorescence intensity of used DNA stain (“PI fluorescence”) corresponding to their DNA content; PI, propidium iodide.

## References

1. Gandin, E.; Lion, Y.; Van de Vorst, A. Quantum yield of singlet oxygen production by xanthene derivatives. *Photochemistry and photobiology* **1983**, *37*, 271–278.
2. Lutkus, L.V.; Rickenbach, S.S.; McCormick, T.M. Singlet oxygen quantum yields determined by oxygen consumption. *Journal of Photochemistry and Photobiology A: Chemistry* **2019**, *378*, 131–135.
3. Kuznetsova, N.; Gretsova, N.; Yuzhakova, O.; Negrimovskii, V.; Kaliya, O.; Luk'Yanets, E. New reagents for determination of the quantum efficiency of singlet oxygen generation in aqueous media. *Russian Journal of General Chemistry* **2001**, *71*, 36–41.
4. Vreman, H.J.; Stevenson, D.K. Heme oxygenase activity as measured by carbon monoxide production. *Analytical biochemistry* **1988**, *168*, 31–38.
5. Usui, Y. Determination of quantum yield of singlet oxygen formation by photosensitization. *Chemistry Letters* **1973**, *2*, 743–744.
